# Supplementary material
Source: Springer Nature journal article supplement (https://www.springermedizin.de/resource/supplementary/12968_2013_3357_MOESM6_ESM.pdf/9583488)

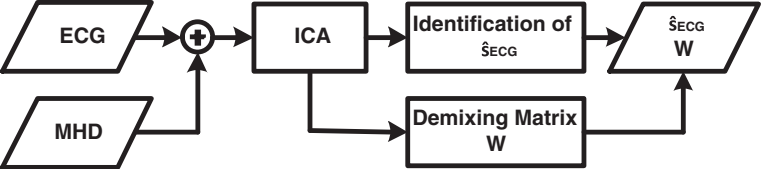

(a) First stage

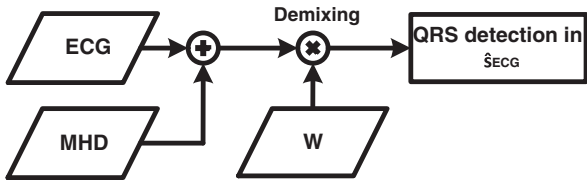

(b) Second stage

Supplement: MOESM6 [file 9583488]
